# Supplementary material for: Transgenically-expressed secretoglobin 3A2 accelerates resolution of bleomycin-induced pulmonary fibrosis in mice
Source: Springer Nature journal article supplement (doi:10.1186/s12890-015-0065-4), 2015-07-15

## 1 **Supporting materials**

2

## 3 **Materials and Methods**

### 4 **Immunofluorescence analysis of embryonic lungs**

5 Immunofluorescence of embryonic lungs was carried out using the following antibodies;  
6 SCGB1A1 (CCSP) as a marker for Club cells (goat anti-CC10, Santa Cruz, 1:1500),  $\beta$ -  
7 tubulin as a marker for ciliated cells (mouse anti- $\beta$ TubulinIV, Abcam, 1:300), PGP9.5 as  
8 a marker for neuroendocrine cells (rabbit anti-PGP9.5, Dako, 1:300), T1 $\alpha$  as a marker for  
9 alveolar type I cells (hamster anti-T1 $\alpha$ , DSHB, 1:1000), and SP-C as a marker for  
10 alveolar type II cells (rabbit anti-pro-SP-C, Abcam, 1:500) with secondary antibodies  
11 conjugated to Alexa Fluor 488, 568, 647 (Donkey, Invitrogen). Samples were imaged  
12 using a Zeiss LSM710 metaconfocal laser-scanning microscope.

13

### 14 **Lung functional analysis**

15 Surface areas were calculated using lung volume and chord length determined using the  
16 method previously described [1]. Hemodynamic parameters such as oxygen saturation,  
17 heart rate, pulse distention, and breath rate were measured using MouseOx<sup>®</sup> small animal  
18 pulse oximeter (Starr Life Sciences, Oakmont, PA).

19

### 20 **Scanning Electron Microscopy (SEM)**

21 SEM was carried out using a modified method of previous description [2, 3]. Briefly, the  
22 trachea and the bronchi were separated from the lung. The tissues were fixed by  
23 immersion in 1% glutaraldehyde for 1 h. The lumina were exposed by removing the

24 dorsal half of the airway by microdissection and fixed again for 2-3 h with 1%  
25 glutaraldehyde. The fixative was made up in 0.1 M phosphate buffer (pH 7.4). Fixation  
26 and washing were carried out on ice or at 4°C, the tissues were then dehydrated through a  
27 graded ethanol series and substituted with *tert*-butanol. The tissues were frozen at -20°C  
28 for a few minutes and then freeze-dried by JFD-320 freeze drying device (JEOL, Tokyo,  
29 Japan). The tissue specimens were mounted on brass studs with aluminum conducting  
30 tape and coated with a 20 nm layer of platinum in a JFC-1600 ion sputterer (JEOL,  
31 Tokyo, Japan). The specimens were examined with a JSM-6510LV SEM (JEOL)  
32 operated at 7 kV. All photographs were taken in the secondary electron mode with the  
33 beam incident to the surface of the issue.

34

## 35 **References**

- 36 1. Knudsen L, Weibel ER, Gundersen HJ, Weinstein FV, Ochs M: **Assessment of**  
37 **air space size characteristics by intercept (chord) measurement: an accurate**  
38 **and efficient stereological approach.** *J Appl Physiol* 2010, **108**(2):412-421.
- 39 2. Abe H, Oikawa T: **Observations by scanning electron microscopy of oviductal**  
40 **epithelial cells from cows at follicular and luteal phases.** *Anat Rec* 1993,  
41 **235**(3):399-410.
- 42 3. Abe H, Onodera M, Sugawara S: **Scanning electron microscopy of goat**  
43 **oviductal epithelial cells at the follicular and luteal phases of the oestrus**  
44 **cycle.** *J Anat* 1993, **183** ( Pt 2):415-421.

45

46

47

## 48 **Figure legends**

49 **Figure S1. Scanning electron microscopy of wild-type (WT) and *Scgb3a2*-transgenic**  
50 **mouse (TG) airways.** Magnification: X2000 (Upper panel) and X5000 (lower panel).

51 Scale bars are as indicated.

52

53 **Figure S2. Characterization of *Scgb3a2*-transgenic embryo lungs. (A-D)** Body  
54 weight **(A)**, body length **(B)**, lung weight **(C)** measurements, and breathing score  
55 assessment **(D)**. Embryonic Day (E) 14.5, 16.5 and 18.5 pups were removed from dams  
56 in wild-type (WT) and *Scgb3a2*-transgenic mice (TG), and were subjected to these  
57 analyses. N>7. A dot represents a lung or an embryo. The results show the mean  $\pm$  S.D.  
58 No statistically significant differences were obtained in any parameters analyzed. **(E)**  
59 Histological characterization of *Scgb3a2*-transgenic mouse lungs at various embryonic  
60 stages. Upper and middle panels: representative H&E staining (H&E) of E14.5 and 18.5  
61 wild-type (WT) and *Scgb3a2*-transgenic mouse (TG) lungs. Scale bar: 50  $\mu$ m. Lower  
62 panel: representative immunostaining for SCGB3A2 (SCGB3A2) in E18.5 WT and TG  
63 embryonic lungs. Brown color indicates positive staining (representatives shown by an  
64 arrow). Scale bar: 20  $\mu$ m. Insert in TG: Immunofluorescence results showing co-  
65 expression of SP-C and SCGB3A2 (in yellow due to mixture of red for SP-C and green  
66 for SCGB3A2, shown by arrowheads). N>3. **(F)** Immunofluorescence analysis of E18.5  
67 embryo lungs. E18.5 wild-type (WT) and *Scgb3a2*-transgenic (TG) embryo lungs were  
68 subjected to immunofluorescence for SCGB1A1 (CCSP),  $\beta$ -tubulin, PGP9.5, T1 $\alpha$ , and

69 SP-C. Representative results are shown from N=2. TB: terminal bronchiole. Scale bar: 20  
70  $\mu\text{m}$ .

71

72 **Figure S3. Lung morphometric analysis.** (A) Surface areas of wild-type (WT) and  
73 *Scgb3a2*-transgenic mouse (TG) lungs determined at various ages. (B-E) Hemodynamic  
74 parameters; Oxygen saturation (B), heart rate (C), pulse distention (D) and breath rate  
75 (E), measured in different age WT and TG mice. N>3. Bar represents the mean  $\pm$  S.D.  
76 No statistically significant differences were obtained in any parameters analyzed.

77

78 **Figure S4. Survival curve of wild-type (WT) and *Scgb3a2*-transgenic mice (TG)**  
79 **after BLM treatment.** No statistical difference was found in the survival curve of WT  
80 and TG mice. N>25 in each group.

81

82

83 **Figure S5. SP-C expression in wild-type (WT) and *Scgb3a2*-transgenic mouse (TG)**  
84 **lungs at 6 and 9 weeks post-BLM administration.** Upper, middle panels:  
85 Immunohistochemistry for SP-C of 6 weeks (upper) and 9 weeks (middle) post-BLM  
86 lungs. Expression was not observed at 6 weeks post-BLM, but the high expression was  
87 found in epithelial and type II cells in both wild-type and transgenic mouse lungs  
88 (representatives shown by arrows). Lowe panel: Immunofluorescence for SP-C (red) and  
89 SCGB3A2 (green) are shown. The bronchial epithelial cells express both proteins  
90 (yellow, representative shown by an arrow). Scale bar: 50  $\mu\text{m}$ .

91

Figure S1

**WT**

**TG**

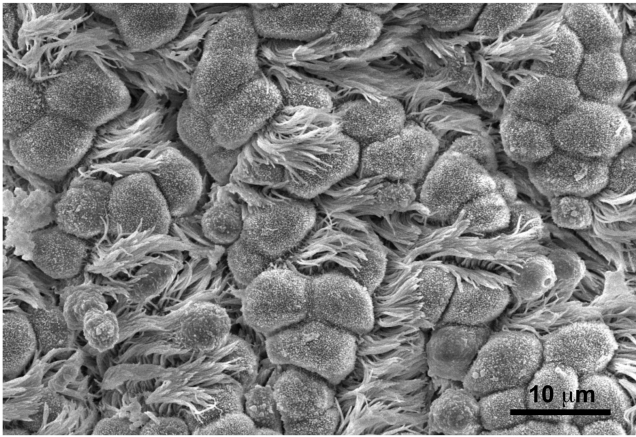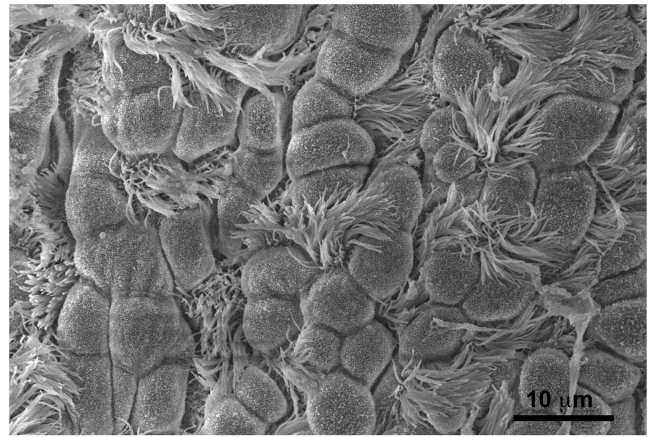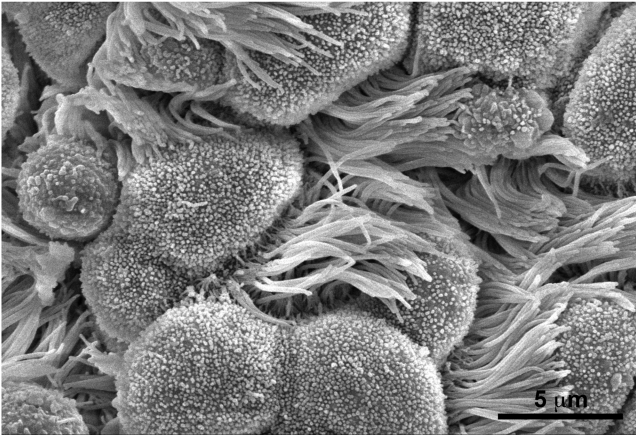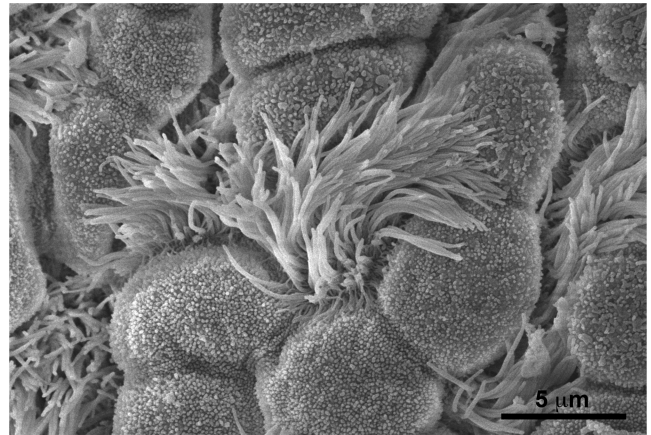

Figure S2

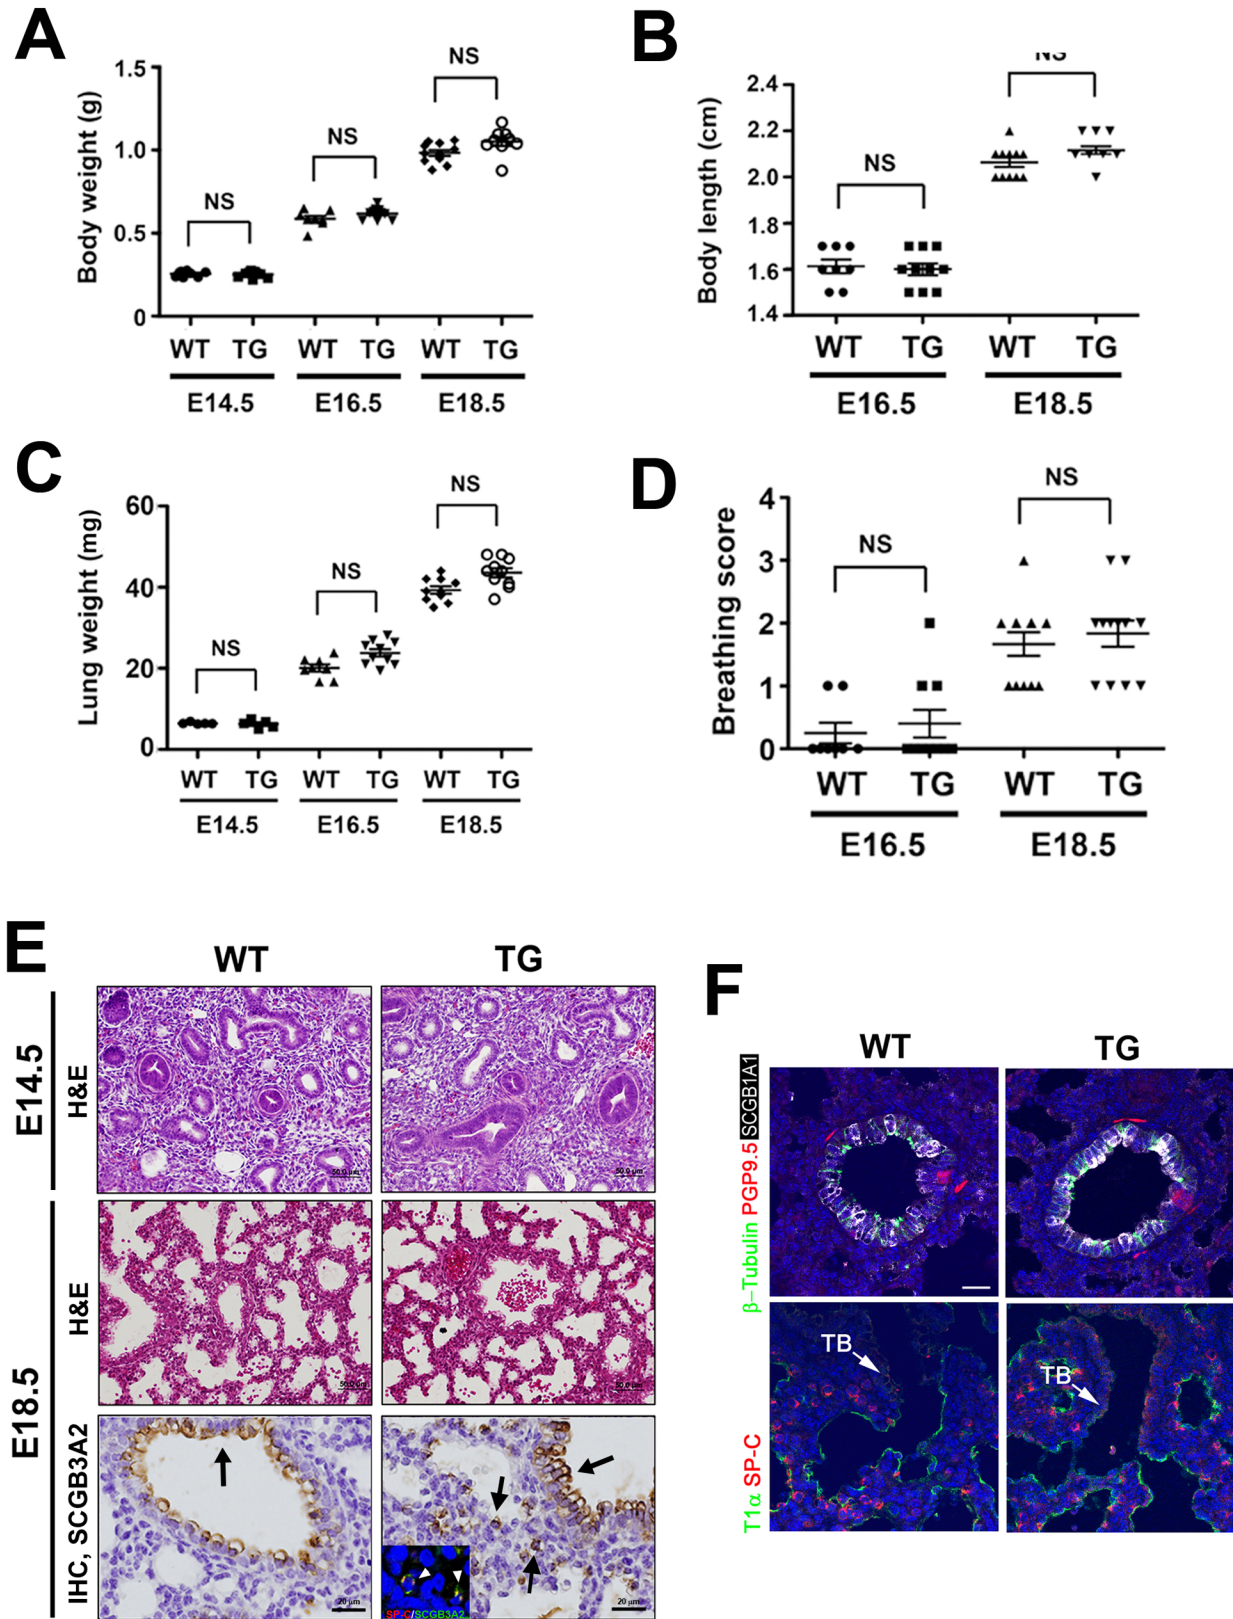

Figure S3

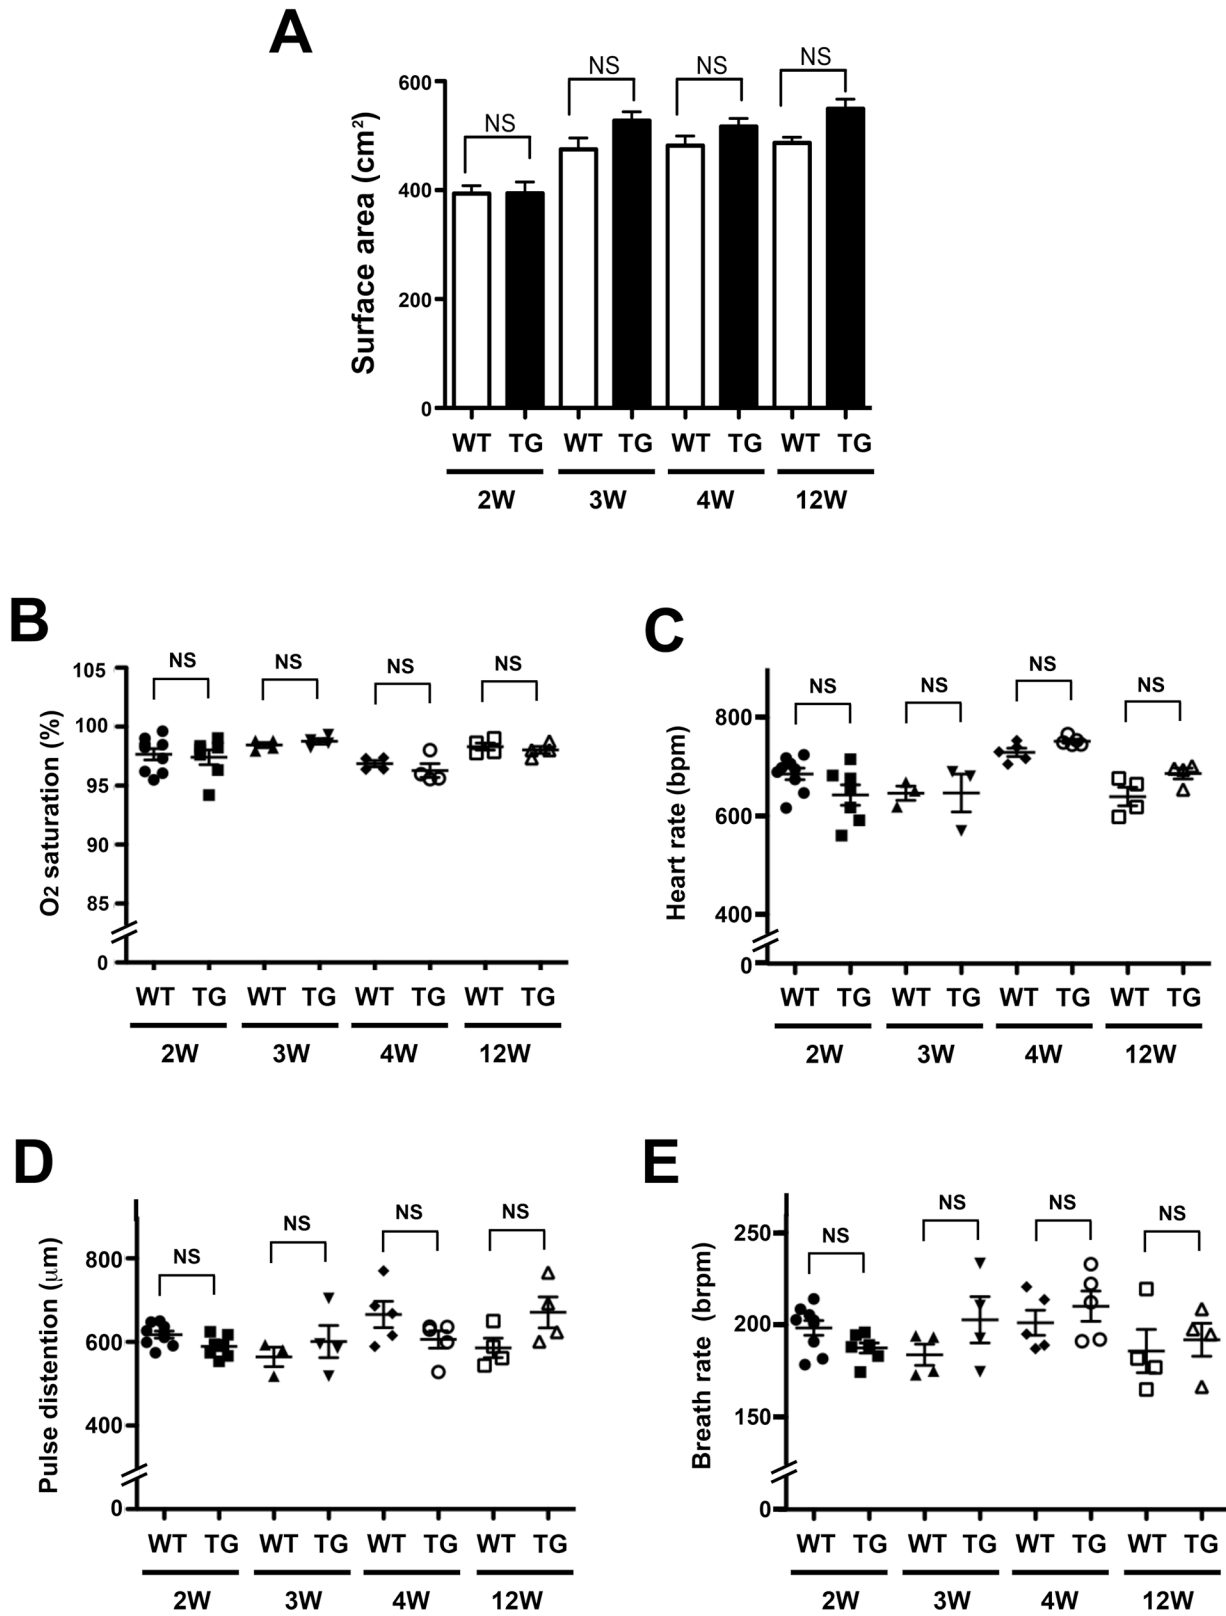

Figure S4

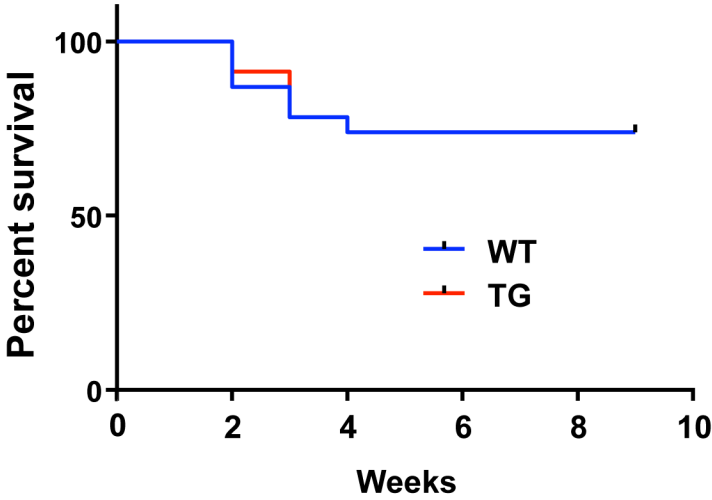



Figure S5

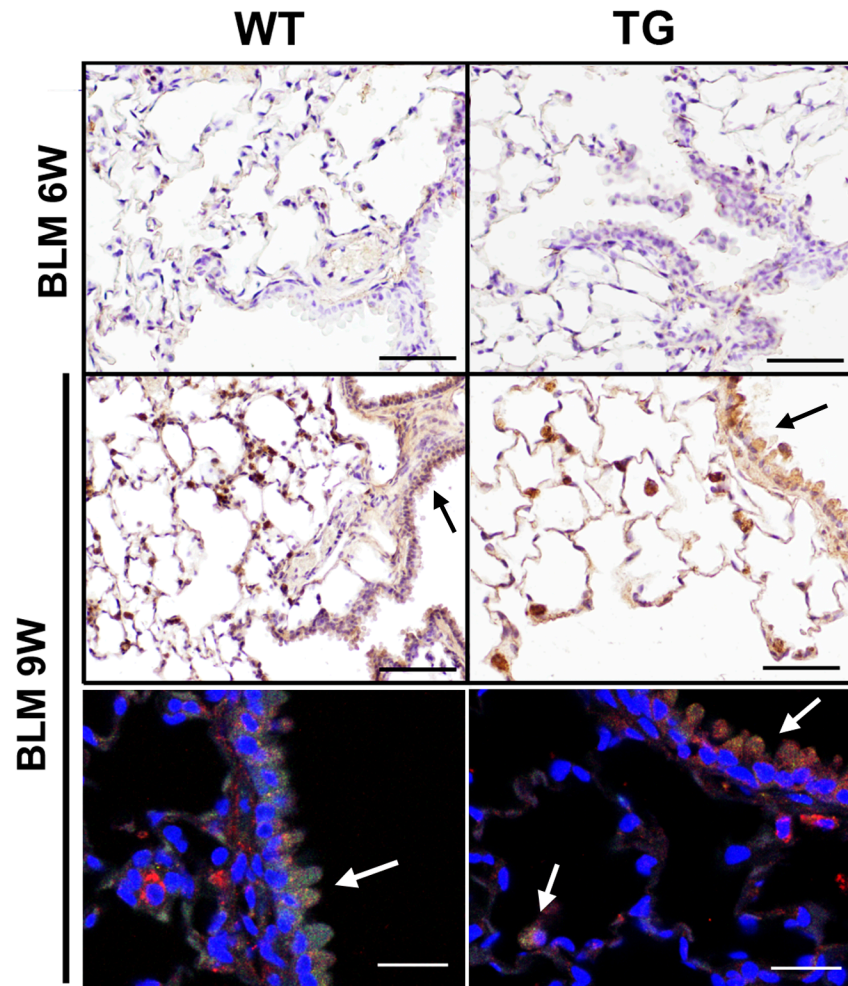

Supplement: MOESM1 [file 9751836]
